# Supplementary material for: Dietary Intake of Red Meat, Processed Meat, and Poultry and Risk of Colorectal Cancer and All-Cause Mortality in the Context of Dietary Guideline Compliance
Source: PubMed Central journal article supplement (PMC7823645; doi:10.3390/nu13010032), 2020-12-23
Supplement: nutrients-13-00032-s001.pdf [file nutrients-13-00032-s001.pdf]

Dietary intake of red meat, processed meat, and poultry and risk of colorectal cancer and all-cause mortality in the context of dietary guideline compliance

Supplement tables

**Table S1.** Baseline characteristics of the colorectal cancer study population stratified by dietary guideline compliance and intake of processed meat, n=6,282

| Dietary guideline compliance <sup>1</sup> | Low         |             | High        |             |
|-------------------------------------------|-------------|-------------|-------------|-------------|
|                                           | Low         | High        | Low         | High        |
| Processed meat intake <sup>2</sup>        |             |             |             |             |
| Age, mean (SD)                            | 53 (11)     | 52 (11)     | 56 (10)     | 55 (10)     |
|                                           | n (%)       | n (%)       | n (%)       | n (%)       |
| <i>Sex</i>                                |             |             |             |             |
| Men                                       | 433 (38.5)  | 1233 (72.0) | 553 (26.7)  | 814 (59.5)  |
| Women                                     | 693 (61.5)  | 480 (28.0)  | 1522 (73.3) | 554 (40.5)  |
| <i>Ethnicity</i>                          |             |             |             |             |
| Danish                                    | 1089 (96.7) | 1691 (98.7) | 2007 (96.7) | 1341 (98.0) |
| Western                                   | 16 (1.4)    | 15 (0.9)    | 33 (1.6)    | 15 (1.1)    |
| Non-western                               | 21 (1.9)    | 7 (0.4)     | 35 (1.7)    | 12 (0.9)    |
| <i>Educational level<sup>3</sup></i>      |             |             |             |             |
| Long                                      | 286 (25.4)  | 379 (22.1)  | 797 (38.4)  | 465 (34.0)  |
| Medium                                    | 500 (44.4)  | 836 (48.8)  | 734 (35.4)  | 595 (43.5)  |
| Short                                     | 340 (30.2)  | 498 (29.1)  | 544 (26.2)  | 308 (22.5)  |
| <i>BMI</i>                                |             |             |             |             |
| Underweight                               | 26 (2.3)    | 21 (1.2)    | 34 (1.6)    | 10 (0.7)    |
| Normal weight                             | 600 (53.3)  | 753 (44.0)  | 1133 (54.6) | 635 (46.4)  |
| Overweight                                | 371 (32.9)  | 682 (39.8)  | 676 (32.6)  | 522 (38.2)  |
| Obese                                     | 129 (11.5)  | 257 (15.0)  | 232 (11.2)  | 201 (14.7)  |
| <i>Smoking</i>                            |             |             |             |             |
| Never                                     | 384 (34.1)  | 611 (35.7)  | 988 (47.6)  | 615 (45.0)  |
| Former                                    | 285 (25.3)  | 473 (27.6)  | 688 (33.2)  | 513 (37.5)  |
| Current                                   | 457 (40.6)  | 629 (36.7)  | 399 (19.2)  | 240 (17.5)  |
| <i>Leisure time physical activity</i>     |             |             |             |             |
| None                                      | 149 (13.2)  | 176 (10.3)  | 124 (6.0)   | 71 (5.2)    |
| Light                                     | 514 (45.6)  | 704 (41.1)  | 822 (39.6)  | 522 (38.2)  |
| Moderate/hard                             | 463 (41.1)  | 833 (48.6)  | 1129 (54.4) | 775 (56.7)  |

Abbreviations: n, number of participants; SD, standard deviation; BMI, Body Mass Index

<sup>1</sup>Low compliance < 3.1 on the Dietary Guideline Compliance Score; High compliance ≥ 3.1 on the Dietary Guideline Compliance Score. Dietary Guideline Compliance Score express the dietary compliance with the five quantitative Danish dietary guidelines on fruit and vegetables, fish, whole grain, saturated fatty acids and added sugars. It can vary between 0 and 5

<sup>2</sup>Processed meat intake: Low < 35 g/day; High ≥ 35 g/day

<sup>3</sup>Long: higher education, medium: high school or vocational school, short: primary school

**Table S2.** Baseline characteristics of the colorectal cancer study population stratified by dietary guideline compliance and intake of poultry, n=6,282

| Dietary guideline compliance <sup>1</sup> | Low          |              | High         |              |
|-------------------------------------------|--------------|--------------|--------------|--------------|
|                                           | Low          | High         | Low          | High         |
| <b>Poultry intake<sup>2</sup></b>         | <b>Low</b>   | <b>High</b>  | <b>Low</b>   | <b>High</b>  |
| Age, mean (SD)                            | 53 (11)      | 51 (11)      | 56 (10)      | 54 (10)      |
|                                           | <b>n (%)</b> | <b>n (%)</b> | <b>n (%)</b> | <b>n (%)</b> |
| <i>Sex</i>                                |              |              |              |              |
| Men                                       | 855 (57.2)   | 811 (60.4)   | 676 (39.5)   | 691 (39.9)   |
| Women                                     | 641 (42.8)   | 532 (39.6)   | 1035 (60.5)  | 1041 (60.1)  |
| <i>Ethnicity</i>                          |              |              |              |              |
| Danish                                    | 1468 (98.1)  | 1312 (97.7)  | 1667 (97.4)  | 1681 (97.1)  |
| Western                                   | 17 (1.1)     | 14 (1.0)     | 20 (1.2)     | 28 (1.6)     |
| Non-western                               | 11 (0.7)     | 17 (1.3)     | 24 (1.4)     | 23 (1.3)     |
| <i>Educational level<sup>3</sup></i>      |              |              |              |              |
| Long                                      | 334 (22.3)   | 331 (24.6)   | 612 (35.8)   | 650 (37.5)   |
| Medium                                    | 713 (47.7)   | 623 (46.4)   | 647 (37.8)   | 682 (39.4)   |
| Short                                     | 449 (30.0)   | 389 (29.0)   | 452 (26.4)   | 400 (23.1)   |
| <i>BMI</i>                                |              |              |              |              |
| Underweight                               | 25 (1.7)     | 22 (1.6)     | 27 (1.6)     | 17 (1.0)     |
| Normal weight                             | 742 (49.6)   | 611 (45.5)   | 868 (50.7)   | 900 (52.0)   |
| Overweight                                | 529 (35.4)   | 524 (39.0)   | 593 (34.7)   | 605 (34.9)   |
| Obese                                     | 200 (13.4)   | 186 (13.8)   | 223 (13.0)   | 210 (12.1)   |
| <i>Smoking</i>                            |              |              |              |              |
| Never                                     | 511 (34.2)   | 484 (36.0)   | 786 (45.9)   | 817 (47.2)   |
| Former                                    | 388 (25.9)   | 370 (27.6)   | 594 (34.7)   | 607 (35.0)   |
| Current                                   | 597 (39.9)   | 489 (36.4)   | 331 (19.3)   | 308 (17.8)   |
| <i>Leisure time physical activity</i>     |              |              |              |              |
| None                                      | 189 (12.6)   | 136 (10.1)   | 102 (6.0)    | 93 (5.4)     |
| Light                                     | 653 (43.6)   | 565 (42.1)   | 672 (39.3)   | 672 (38.8)   |
| Moderate/hard                             | 654 (43.7)   | 642 (47.8)   | 937 (54.8)   | 967 (55.8)   |

Abbreviations: n, number of participants; SD, standard deviation; BMI, Body Mass Index

<sup>1</sup>Low compliance < 3.1 on the Dietary Guideline Compliance Score; High compliance ≥ 3.1 on the Dietary Guideline Compliance Score. Dietary Guideline Compliance Score express the dietary compliance with the five quantitative Danish dietary guidelines on fruit and vegetables, fish, whole grain, saturated fatty acids and added sugars. It can vary between 0 and 5

<sup>2</sup>Poultry intake: Low < 16 g/day; High ≥ 16 g/day

<sup>3</sup>Long: higher education, medium: high school or vocational school, short: primary school
